# Supplementary material for: Inter-Individual Differences in RNA Levels in Human Peripheral Blood
Source: PLoS One. 2016 Feb 10;11(2):e0148260. doi: 10.1371/journal.pone.0148260 (PMC4749217; doi:10.1371/journal.pone.0148260)
Supplement: S2 Table — (XLSX) [file pone.0148260.s006.xlsx]

## Sheet: Sheet1
	Age (years)	Total RNA (µg/ml blood)	DNA (µg/ml blood)	White Cells (106 / ml blood)
Mean	62.63 ± 9.15	14.58 ± 4.47	52.77 ± 20.75	6.96 ± 2.54
Range	50-89	6.70-22.72	26.4-123.4	3.4-15.6

## Sheet: Sheet2
	Sample	RNA	RNA	DNA	WBC	Neutrophils		Lymphocytes		Monocytes		RBC	Platelet
	Number	µg/ml	pg/cell	µg/ml	103/µl	103/µl	%	103/µl	%	103/µl	%	106/µl	103/µl
LOW RNA	180	6.69	1.96765	26.44	3.4	1.9	55.8824	1.1	32.3529	0.3	8.82353	4.12	268
	154	8.12	1.88837	32.81	4.3	2.3	53.4884	1.5	34.8837	0.3	6.97674	4.53	224
	168	8.43	1.75625	29.36	4.8	2.9	60.4167	1.4	29.1667	0.3	6.25	3.99	226
	173	8.58	1.56	45.34	5.5	3.7	67.2727	2.4	43.6364	0.4	7.27273	4.16	243
	163	10.47	1.90364	48.3	5.5	2.8	50.9091	2	36.3636	0.5	9.09091	4.47	222
Mean		8.458	1.81518	36.45	4.7	2.72	57.5938	1.68	35.2807	0.36	7.68278	4.254	236.6
SD		1.35128	0.162032	9.78739	0.886002	0.679706	6.44436	0.51672	5.41065	0.0894427	1.22511	0.234158	19.4371
HIGH RNA	162M	22.72	2.77073	53.56	8.2	5.5	67.0732	2	24.3902	0.4	4.87805	4.42	250
	152M	22.46	2.64235	66.93	8.5	5.1	60	2.4	28.2353	0.7	8.23529	4.63	265
	150	21.99	1.89569	94.44	11.6	7.7	66.3793	2.4	20.6897	0.8	6.89655	3.85	342
	153	21.78	3.06761	54.8	7.1	4.6	64.7887	1.9	26.7606	0.4	5.6338	4.48	257
	151	21.69	2.23608	44.8	9.7	5.8	59.7938	2.6	26.8041	0.8	8.24742	4.85	317
Mean		22.128	2.52249	62.906	9.02	5.74	63.607	2.26	25.376	0.62	6.77822	4.446	286.2
SD		0.445163	0.460448	19.3098	1.71377	1.18448	3.48738	0.296648	2.96081	0.204939	1.51789	0.372196	40.8497
Fold increase		2.61622	1.38966	1.72582	1.91915	2.11029	1.10441	1.34524	0.71926	1.72222	0.882262	1.04513	1.20964

## Sheet: Sheet3
RNA	Sample	Total RNA	GAPDH		ACTB		HPRT
Sample Group	Number	(µg/ml blood)	(U/ng RNA )	(U/ml blood x 103)	(U/ng RNA )	(U/ml blood x 103)	(U/ng RNA )	(U/ml blood x 103)
	180	6.69	14.31	95.72	208.25	1393.19	0.94	6.31
	154	8.12	12.9	104.72	154.67	1255.91	0.59	4.82
LOW	168	8.43	12.7	107.1	288.19	2429.4	0.8	6.76
	173	8.58	8.91	76.44	288.08	2471.75	0.97	8.32
	163	10.47	12.05	126.12	143.92	1506.83	0.68	7.08
	Mean	8.458	12.17	102.02	216.62	1811.42	0.796	6.658
	SD	1.35	2	18.08	69.68	590.38	0.16	1.27
	162M	22.72	12.98	294.89	182.21	4139.79	0.55	12.59
	152M	22.46	11.8	265.06	165.87	3725.45	0.54	12.18
HIGH	150	21.99	5.83	128.12	140.09	3080.56	0.36	7.98
	153	21.78	6.4	139.31	141.38	3079.18	0.37	7.99
	151	21.69	19.25	417.47	330.33	7164.78	0.96	20.77
	Mean	22.128	11.25	248.97	191.97	4237.95	0.556	12.302
	SD	0.45	5.48	149.55	79.33	1697.13	0.24	5.22
Probability Test			NS	P< 0.05	NS	P< 0.05	NS	P< 0.05
Fold Increase		2.61622	0.924404	2.4404	0.886206	2.33957	0.698492	1.8477

## Sheet: Sheet4
Patient ID	Age	Ethnicity	Total RNA (µg/ml blood)	large RNA (µg/ml blood)	small RNA (µg/ml blood)	DNA (ug/ml blood)	WBC counts (103 µl blood)	pg RNA / cell	Neutrophils (x 103 / µl blood)	Lymphocytes (x 103 /µl blood)	Monocytes (x 103 /µl blood)	Eosinophils (x 103 /µl blood)	Basophils (x 103 /µl blood)	Immature Granulocytes (x 103 /µl blood)	RBC's ( x 106 / µl blood)	Platelets ( x 103 /µl blood)	Hematocrit (%)	RIN
172	57	Cau	13.92	10.05	3.88	42.14	6.2	2.24516	3.2	2.3	0.5	0.1	0	0	4.27	313	36.4	7.3
173	58	Cau	8.58	6.12	2.47	45.34	5.5	1.56	3.7	2.4	0.4	0.1	0.1	0	4.16	243	41.1	7.9
177M	52	Cau	18.68	14.36	4.32	68.91	8.7	2.14713	5	2.7	0.6	0.2	0	0	5.08	236	34.8	7.3
178	59	Cau	16.69	12.68	4.01	123.4	15.6	1.06987	12.5	1.3	1.7	0	0	0	3.55	321	38.9	7.5
179	51	Cau	18.16	13.7	4.47	40.76	5	3.632	3.1	1.4	0.4	0.1	0	0	5.45	200	41.7	7.2
180	58	Cau	6.69	4.18	2.51	26.44	3.4	1.96765	1.9	1.1	0.3	0.1	0	0	4.12	268	39.6	7.7
161	55	Cau	18.11	15.84	2.27	38.83	9.2	1.96848	5	3.4	0.5	0.3	0.1	0	4.78	324	43.5	6.7
162M	56	Cau	22.72	17.48	5.24	53.56	8.2	2.77073	5.5	2	0.4	0.2	0.1	0.1	4.42	250	42.6	7.4
163	57	Cau	10.47	9.08	1.91	48.03	5.5	1.90364	2.8	2	0.5	0.2	0	0	4.47	222	44	7.4
165	59	Cau	12.63	9.63	3	43.88	6.1	2.07049	3.5	2	0.4	0.1	0	0	4.71	279	40	7.1
166	79	Cau	11.15	9	2.15	66.95	6.6	1.68939	1.8	3.6	0.8	0.3	0.1	0	4.41	183	38.7	7.9
169	62	Cau	11.12	8.5	2.62	70.87	4.6	2.41739	2.4	1.6	0.5	0.2	0	0	4.77	228	38.2	7.2
159	70	IN/IT	13.66	10.39	3.27	54.47	7.2	1.89722	4.7	1.9	0.5	0.1	0	0	4.25	301	45.3	7.5
160M	72	Cau	12.47	9.31	3.16	63.33	8.2	1.52073	5	1.7	1.1	0.4	0	0	4.59	225	42.4	7.7
167M	56	Cau	15.72	11.82	3.9	62.24	8	1.965	5	2.1	0.6	0.2	0.1	0	5.14	246	43.4	7.4
170	82	AA	11.72	8.92	2.8	42.63	5	2.344	2.3	2	0.3	0.4	0	0	4.16	185	41.6	7.4
171M	67	Cau	11.01	7.92	3.1	50.36	5.5	2.00182	2.8	1.6	0.7	0.3	0	0	4.67	202	42.3	7.7
101	71	Cau	17.69	14.36	3.32	39.74	7.9	2.23924	5.3	1.5	0.6	0.4	0.1	0	4.42	294	40.9	7.2
151	63	Cau	21.69	17.6	4.1	44.8	9.7	2.23608	5.8	2.6	0.8	0.5	0	0	4.85	317	40.6	7.3
157	64	Cau	14.23	11.13	3.11	34.52	6.3	2.25873	2.9	2.8	0.4	0.2	0	0	4.25	233	39.7	7.3
158	68	AA	13.57	10.09	3.48	44.5	6.2	2.18871	3.5	2.3	0.4	0	0	0	4.24	356	41.5	8
164M	89	His	10.41	6.96	3.45	45.28	5.9	1.76441	3.4	1.6	0.5	0.5	0	0	4.08	178	45.5	7.3
168	64	AA	8.43	5.93	2.49	29.36	4.8	1.75625	2.9	1.4	0.3	0.1	0	0	3.99	226	47.2	7.5
93	65	Cau	13.19	10.28	2.91	42.56	5.2	2.53654	3	1.8	0.4	0	0	0	4.65	253	33.6	7.7
94M	65	Cau	15.47	11.76	3.71	48.93	7.2	2.14861	3	3.2	0.7	0.3	0.1	0	5.1	255	41.8	7.8
96M	74	AA	14.31	11.67	2.64	60.64	7.3	1.96027	4.1	2	0.8	0.3	0	0	4.56	260	42.6	7.6
98	57	Cau	9.76	7.33	2.46	60.52	7.4	1.31892	5.6	1.3	0.3	0.1	0	0	4.63	262	42	7.4
102M	58	Cau	19.12	13.83	5.29	101.28	12.3	1.55447	8.7	2.8	0.6	0.1	0	0	4.89	271	43.7	7.7
103	64	Cau	11.32	8.22	3.09	28.63	3.6	3.14444	1.6	1.7	0.2	0.1	0	0	4.1	203	46.8	7.5
150	70	Cau	21.99	16.97	5.01	94.4	11.6	1.89569	7.7	2.4	0.8	0.5	0.1	0.1	3.85	342	45.7	7.3
152M	61	Cau	22.46	18.18	4.28	66.93	8.5	2.64235	5.1	2.4	0.7	0.2	0	0	4.63	265	45	6.8
153	57	Cau	21.78	17.37	4.41	54.8	7.1	3.06761	4.6	1.9	0.4	0.2	0	0	4.48	257	40.7	7.3
154	50	Cau	8.12	5.6	2.51	32.81	4.3	1.88837	2.3	1.5	0.3	0.1	0	0	4.53	224	32.9	8
155	52	Cau	14.97	11.49	3.48	41.27	5.3	2.82453	3	1.7	0.4	0.1	0	0	4.99	265	42.6	7.3
156	50	AA	18.15	13.76	4.39	33.68	4.4	4.125	2.2	1.8	0.3	0.1	0	0	4.62	287	39.4	6.9
Mean	62.6286		14.576	11.186	3.406	52.7654	6.95714	2.19203	4.14	2.05143	0.545714	0.202857	0.0228571	0.00571429	4.51029	256.4	41.3343	7.43429
± 1 SD	9.14937		4.47463	3.7715	0.895837	20.7515	2.54053	0.621655	2.18047	0.607004	0.280066	0.142428	0.0426043	0.0235504	0.398228	45.4184	3.39705	0.309594

## Sheet: S2 Table 29
S2 Table. PCR Primer Compositions
Gene	NCBI Reference Sequence	Forward primer (5' to 3')	Reverse primer (5' to 3')	Product Size (bp)
GAPDH	NM_002046.6	CAAATTCCATGGCACCGTCA	TCCTGGAAGATGGTGATGGGA	75
ACTB	NM_001101.3	AGTTCACAATGTGGCCGAGG	AGTGGGGTGGCTTTTAGGATG	115
HPRT1	NM_000194.2	GCTGAGGATTTGGAAAGGGTGT	TCTCGAGCAAGACGTTCAGT	71
